# Supplementary material
Source: HighWire-hosted journal article supplement (https://jnm.snmjournals.org/highwire/filestream/93946/field_highwire_adjunct_files/0/51896_Supplemental_Figure.pdf)
Supplement: 51896_Supplemental_Figure.pdf [file 51896_Supplemental_Figure.pdf]

A

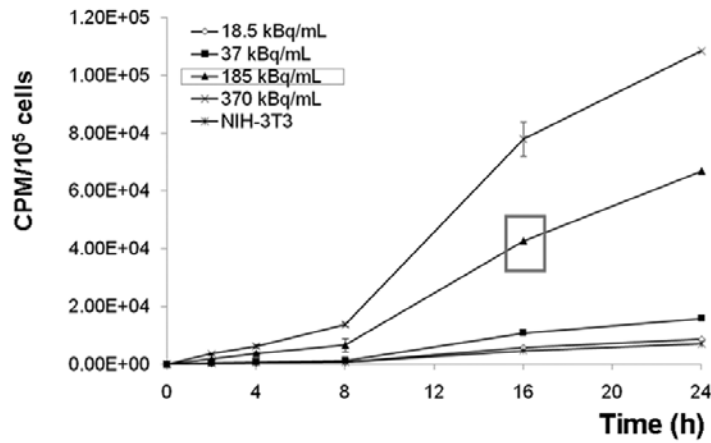

B

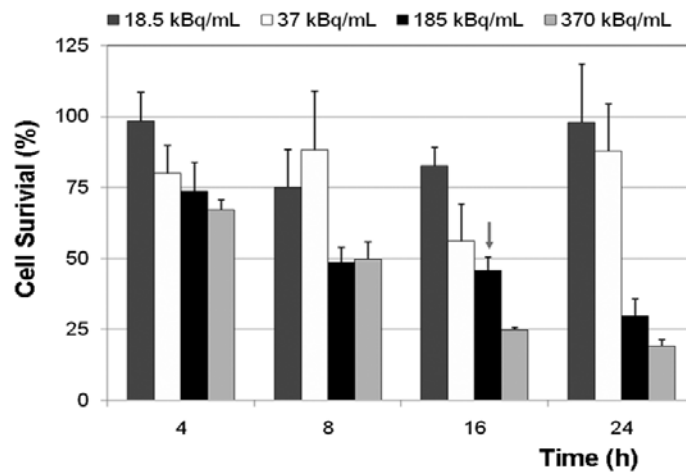

**FIGURE 1.** In vitro analyses of  $^{131}\text{I}$ -FIAU-labeled NIH3T3-TG cells. (A) Cellular uptake of  $^{131}\text{I}$ -FIAU is time-dependent in HSV1-TK-transduced NIH3T3-TG cells but not in parental NIH3T3 cells. Optimal labeling condition was indicated by boxed area. (B) Time-dependent survival ratio of NIH3T3-TG labeled with  $^{131}\text{I}$ -FIAU in vitro. Survival ratio was determined by using colony formation to compare number of surviving colonies of NIH3T3-TG incubated with or without  $^{131}\text{I}$ -FIAU for various time points. Optimal amount of radioactivity uptake and percentage NIH3T3-TG cell survival was determined at 185 kBq/mL for 16 h (indicated by the downward arrow).
